# Supplementary material for: Poly(ethylene-imine)-Functionalized Magnetite Nanoparticles Derivatized with Folic Acid: Heating and Targeting Properties
Source: MDPI journal article supplement (doi:10.3390/polym13101599), 2021-05-15
Supplement: s1 [file s1]

# Poly (Ethylene Imine)-Functionalized Magnetite Nanoparticles Derivatized with Folic Acid. Heating and Targeting Properties

Mariano Ortega-Muñoz <sup>1</sup>, Simona Plesselova <sup>2</sup>, Angel V. Delgado<sup>3</sup>, Francisco Santoyo-Gonzalez <sup>1</sup>, Rafael Salto-Gonzalez <sup>2</sup>, Maria Dolores Giron-Gonzalez <sup>2</sup>, Guillermo R. Iglesias<sup>3,\*</sup> and Francisco Javier López-Jaramillo <sup>1,\*</sup>

<sup>1</sup> Department of Organic Chemistry, Institute of Biotechnology, Faculty of Sciences, University of Granada, 18071 Granada, Spain; mortegam@ugr.es (M.O.-M.); fsantoyo@ugr.es (F.S.-G.)

<sup>2</sup> Department of Biochemistry and Molecular Biology II, Faculty of Pharmacy, University of Granada, 18071 Granada, Spain; s.plesselova@gmail.com (S.P.); rsalto@ugr.es (R.S.-G.); mgiron@ugr.es (M.D.G.-G.)

<sup>3</sup> Department of Applied Physics, Faculty of Sciences, University of Granada, 18071 Granada, Spain; adelgado@ugr.es

\* Correspondence: fjljara@ugr.es (F.J.L.-J.); iglesias@ugr.es (G.R.I.)

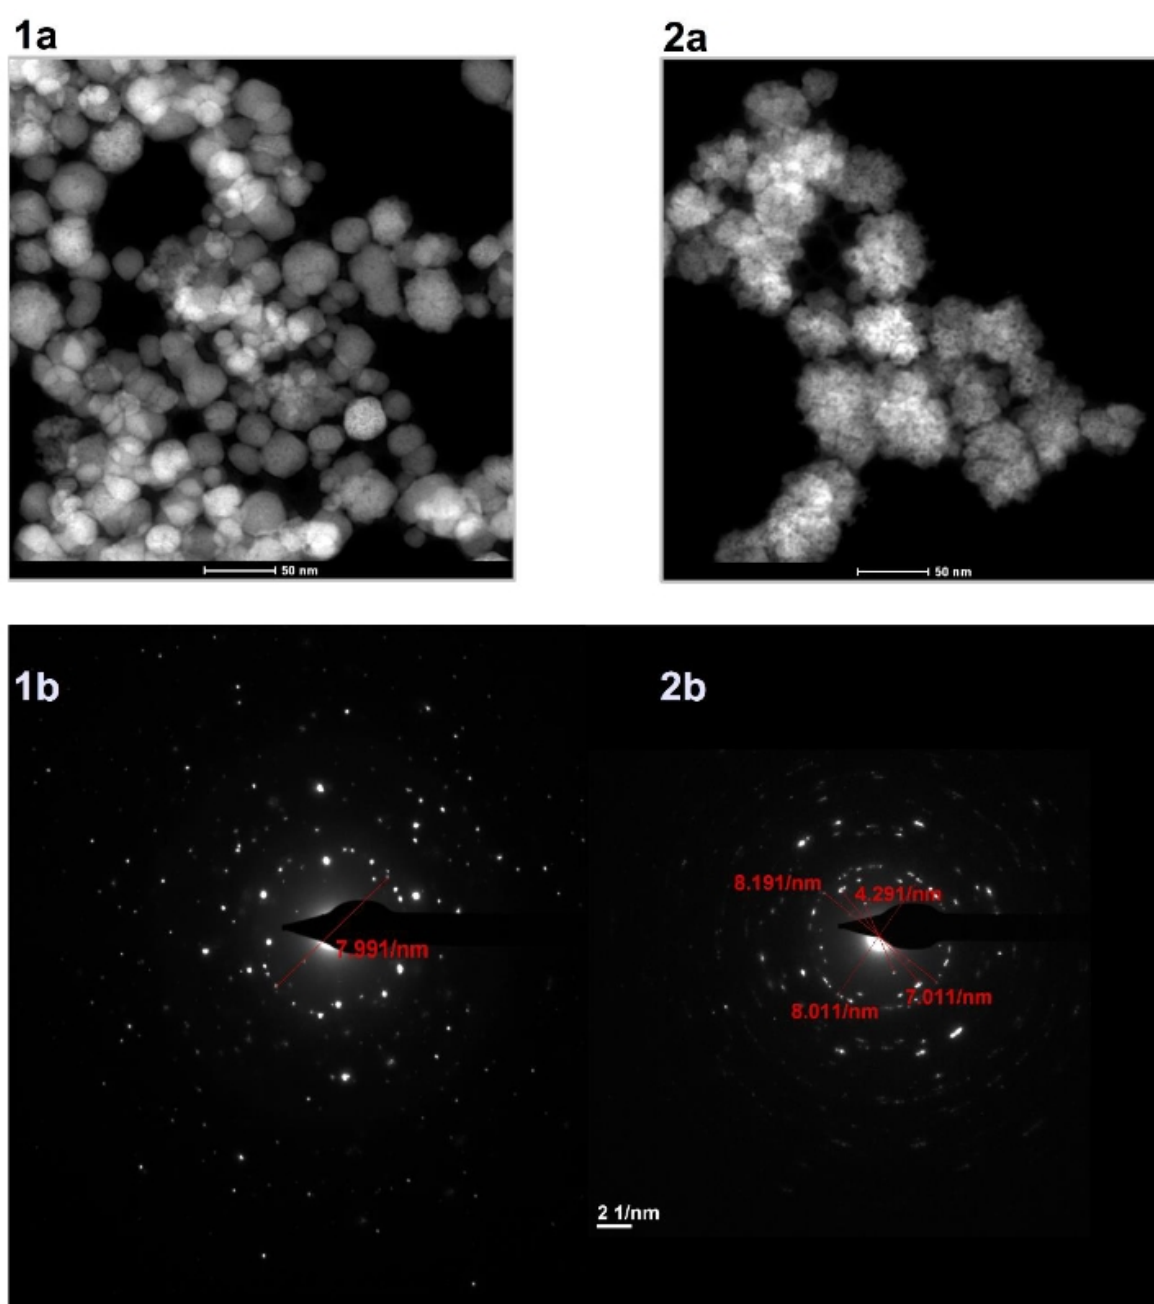

**Figure S1.** Dark field transmission electron microscopy image (a) and selected area electron diffraction (b) of MNP-1(1) and MNP-3(2).

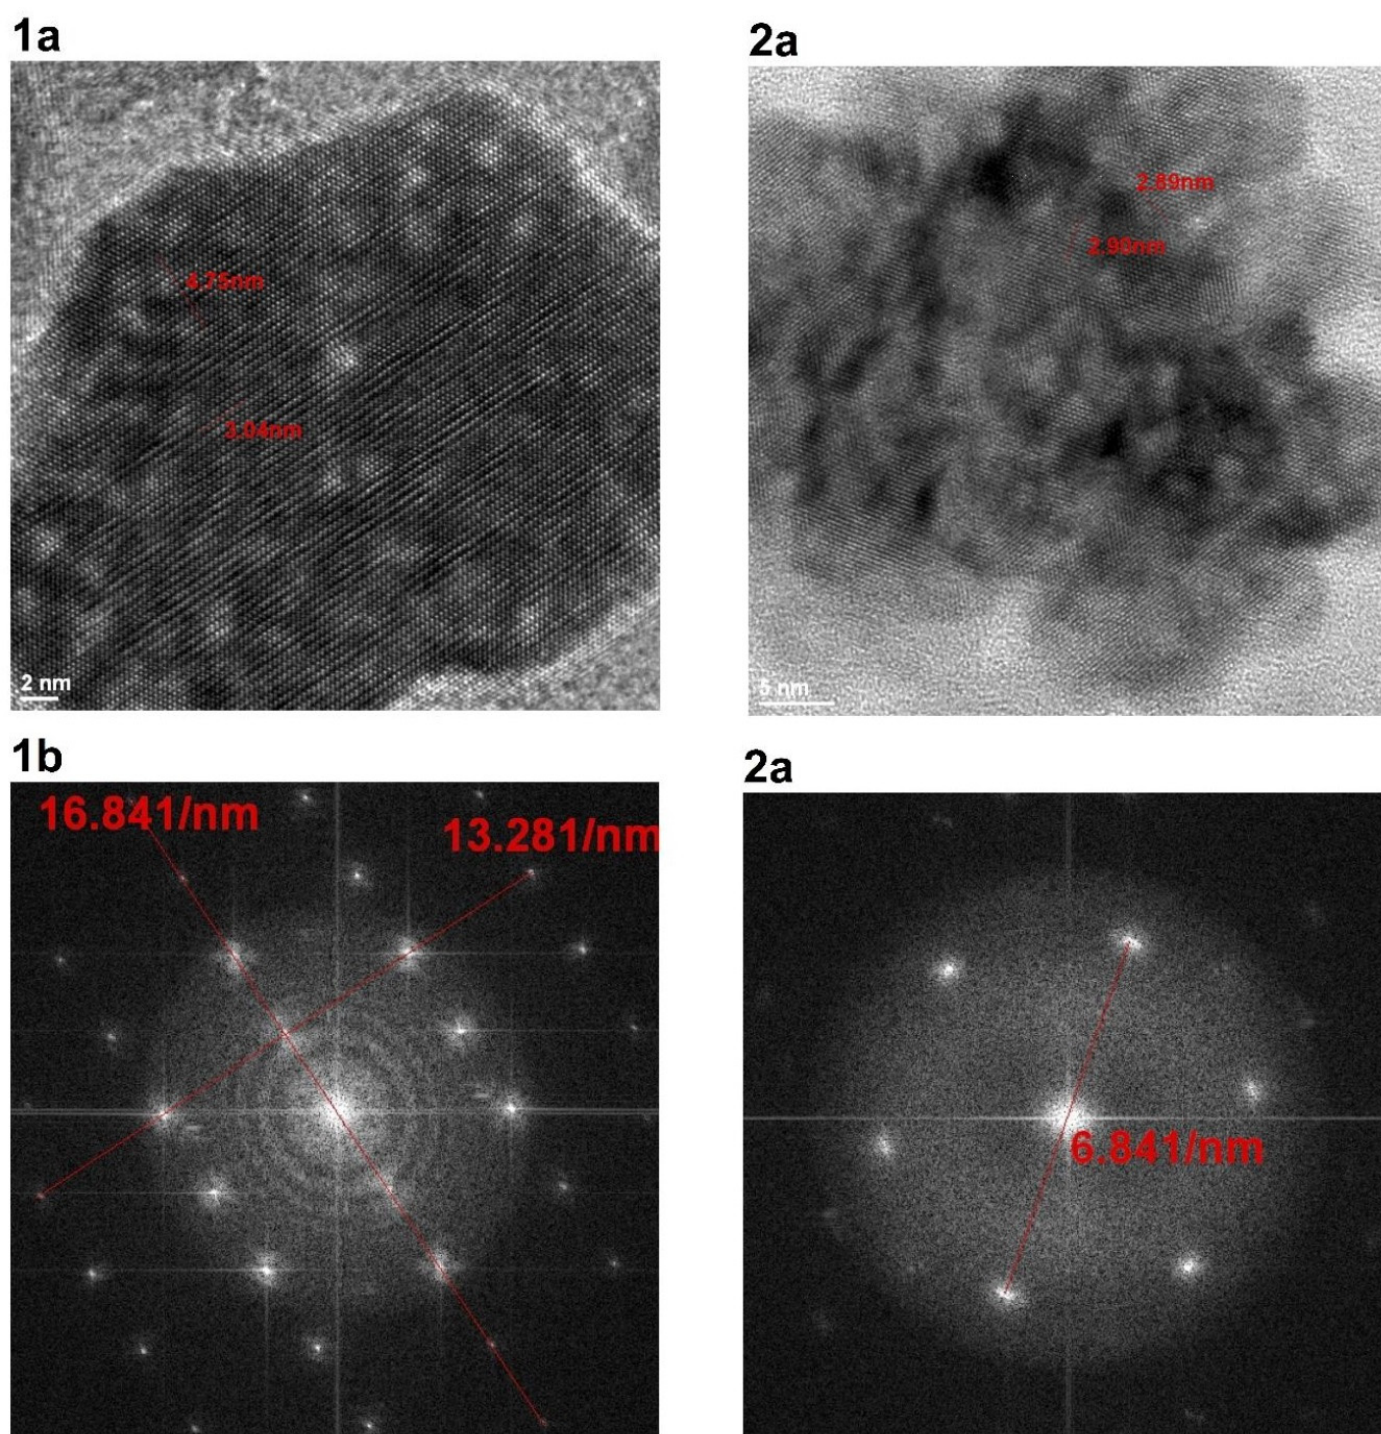

**Figure S2.** High resolution transmission electron microscopy image (a) and selected area electron diffraction (b) of MNP-1 (1) and MNP-3 (2).



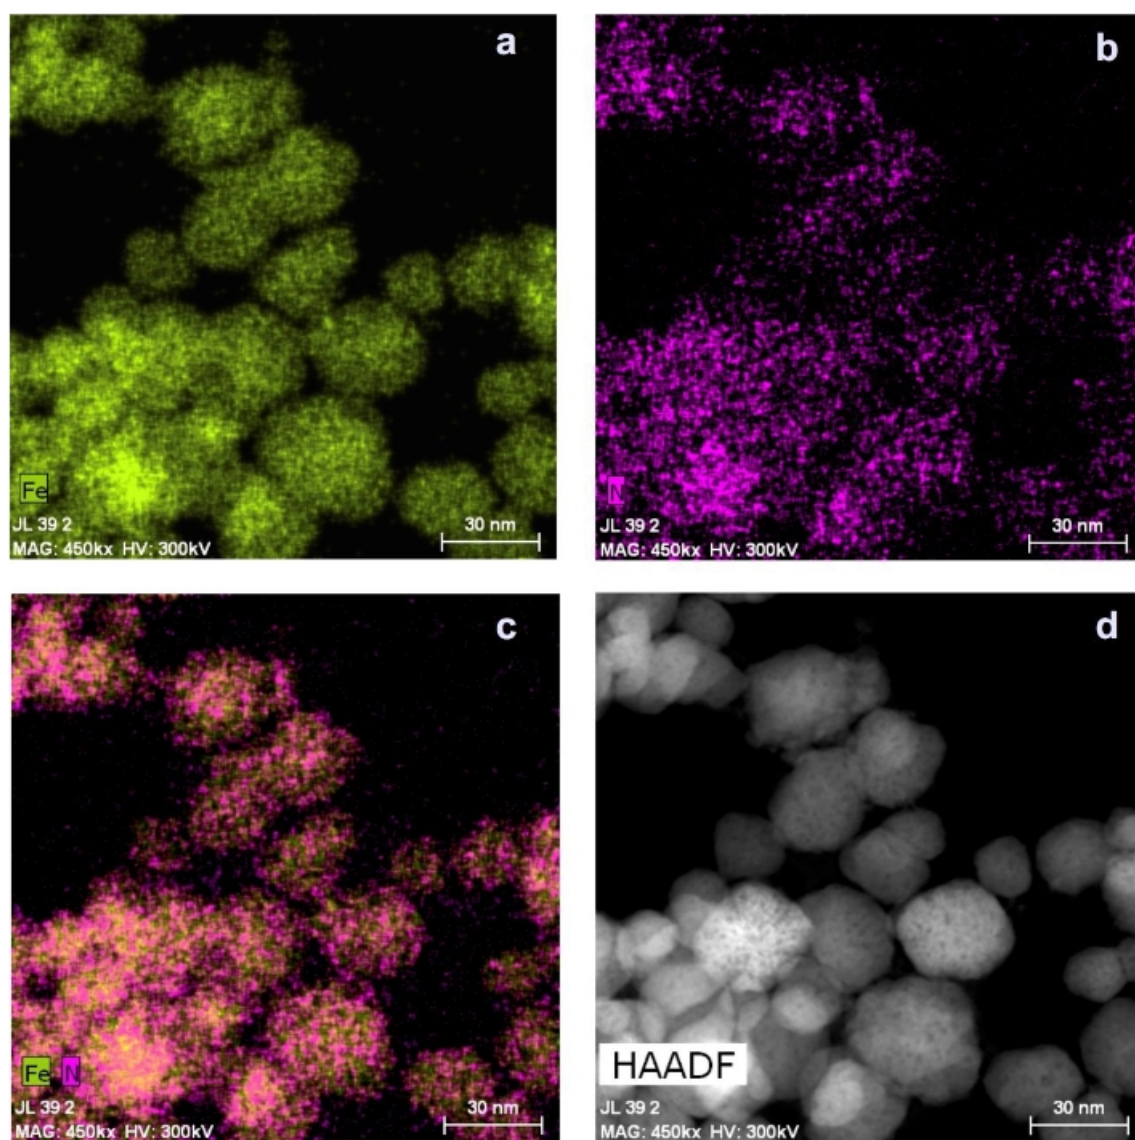

**Figure S3.** High-angle annular dark-field (HAADF) images of MNP-1 showing the distribution of Fe (a), N (b), Fe and N (c), and H (d) atoms.

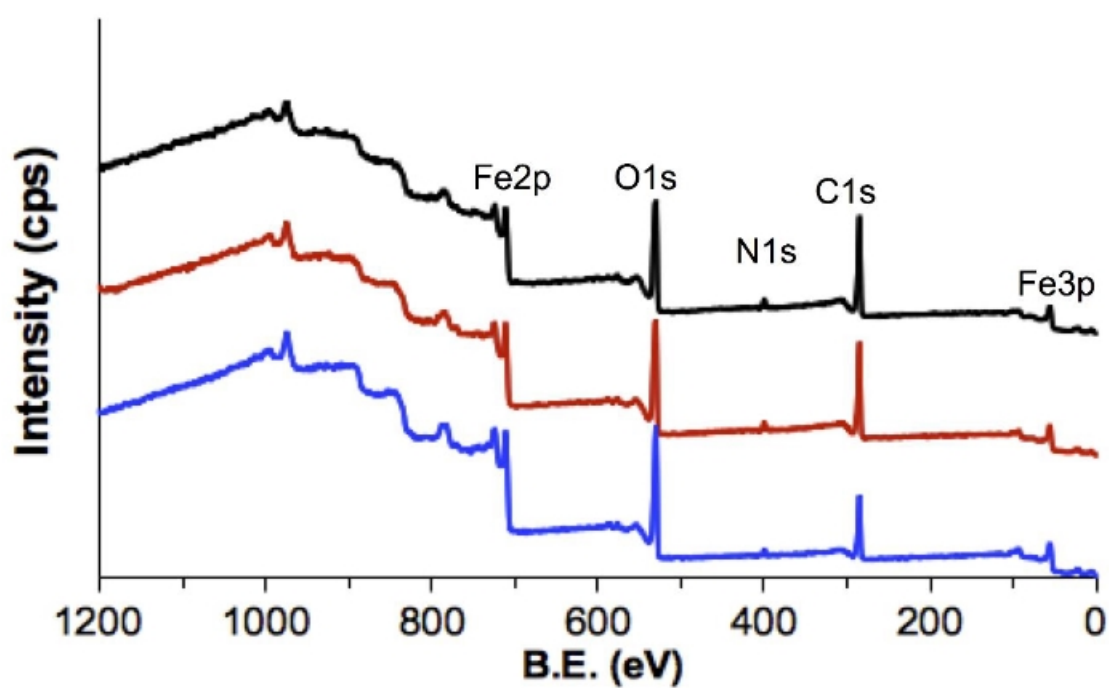

**Figure S4.** XPS spectra of samples (from bottom to top) MNP-1(blue), MNP-2(red), and MNP-3(black).

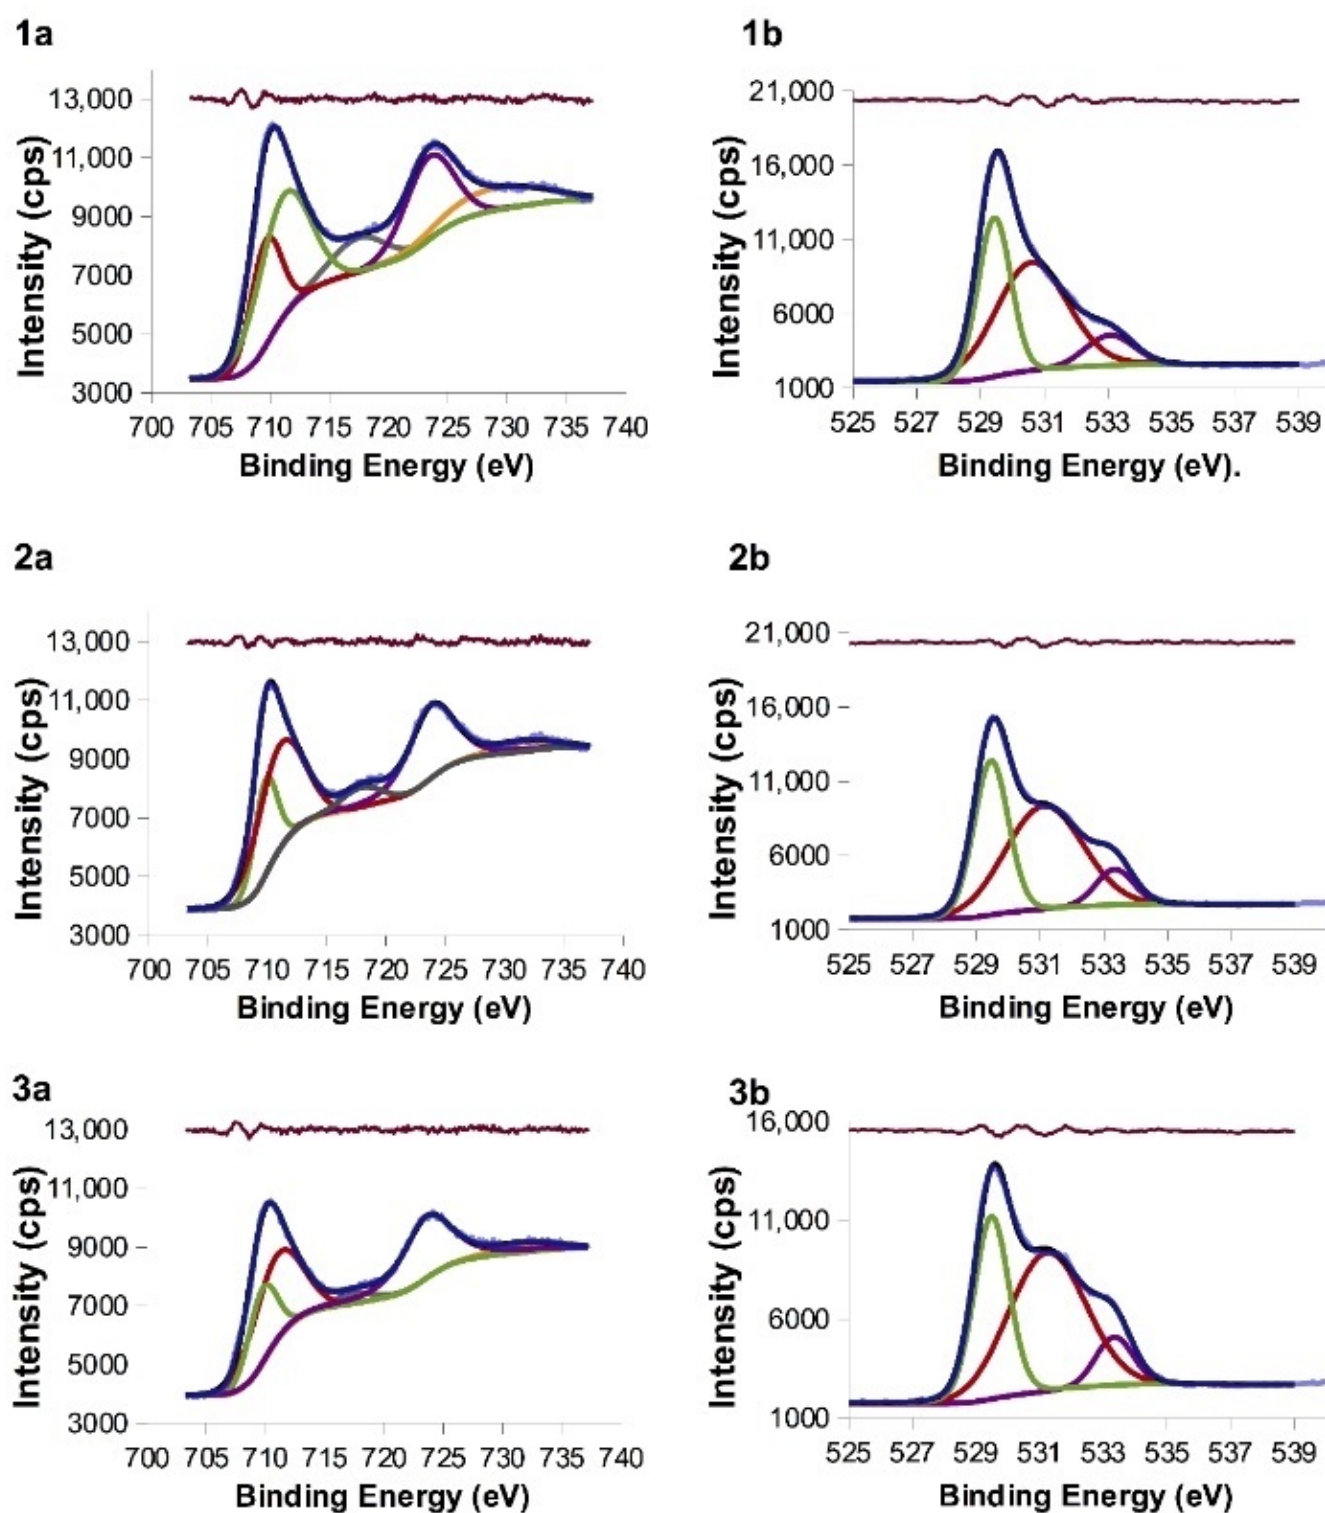

**Figure S5.** High-resolution XPS spectra of Fe2p (a) and O1s (b) of MPN-1 (1), MNP-2 (2) and MNP-3 (3). Experimental data are shown in light blue, envelope in blue, and residuals (on top) in brown.

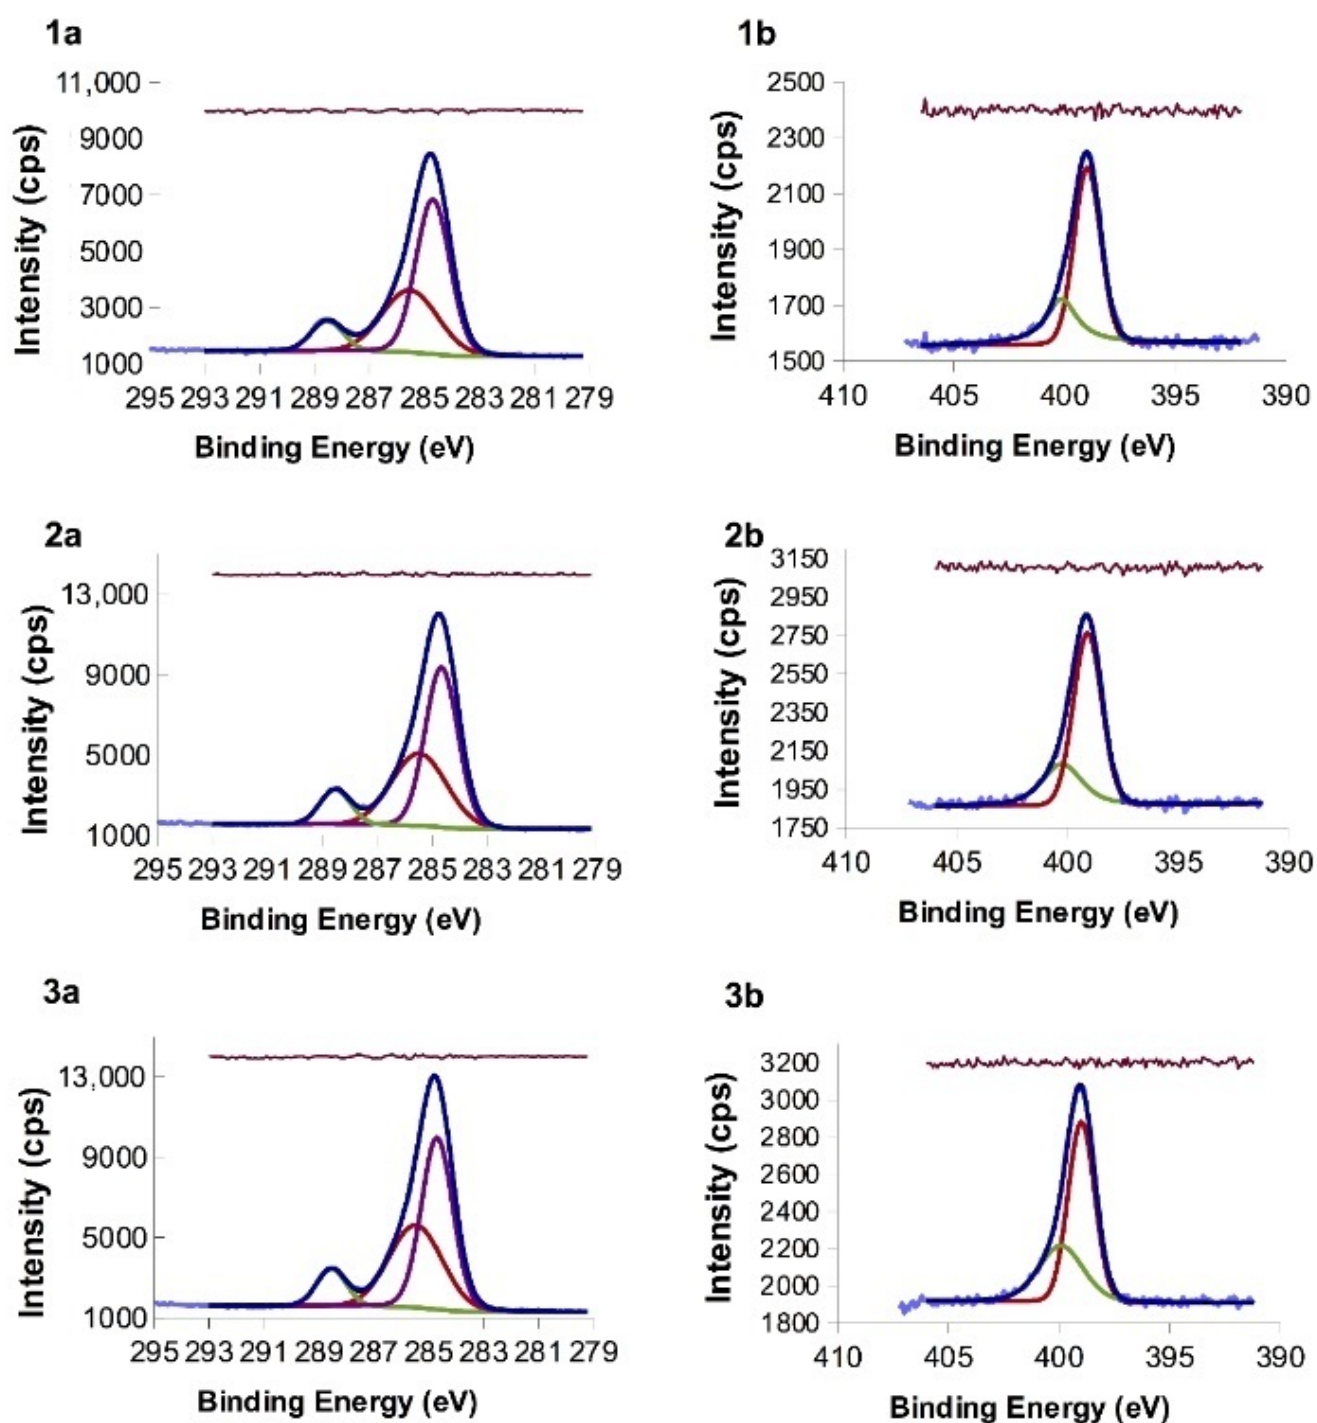

**Figure S6.** High-resolution XPS spectra of C1s (a) and N1s1s (b) of MNP-1 (1), MNP-2 (2) and MNP-3 (3). Experimental data are shown in light blue, envelope in blue, and residuals (on top) in dark red.

**Table S1.** Quantification (%atomic concentration) by XPS of the most significant peaks detected in MNP-1, MNP-2 and MNP-3.

|       | MNP-1 | MNP-2 | MNP-3 |
|-------|-------|-------|-------|
| %C1s  | 44.9  | 56.7  | 58.8  |
| %O1s  | 38.6  | 31.8  | 30.8  |
| %Fe2p | 13.5  | 8.4   | 7.4   |
| %N1s  | 2.1   | 2.5   | 2.3   |
